# Supplementary material for: Polymer-regulated epitaxial crystallization of methanofullerene on mica
Source: Royal Society of Chemistry journal article supplement (doi:10.1039/c2cp42614e), 2012-11-05
Supplement: c2cp42614e.pdf [file c2cp42614e.pdf]

**Polymer-Regulated Epitaxial Crystallization of Methanofullerene on Mica**

*Lidong Zheng Jiangang Liu and Yanchun Han\**

State Key Laboratory of Polymer Physics and Chemistry, Changchun Institute of  
Applied Chemistry, Chinese Academy of Sciences; Graduate University of the  
Chinese Academy of Sciences, 5625 Renmin Street, Changchun 130022, People's  
Republic of China.

Tel: 86-431-85262175, Fax: 86-431-85262126, Email: [ychan@ciac.jl.cn](mailto:ychan@ciac.jl.cn)

\* To whom correspondence should be addressed

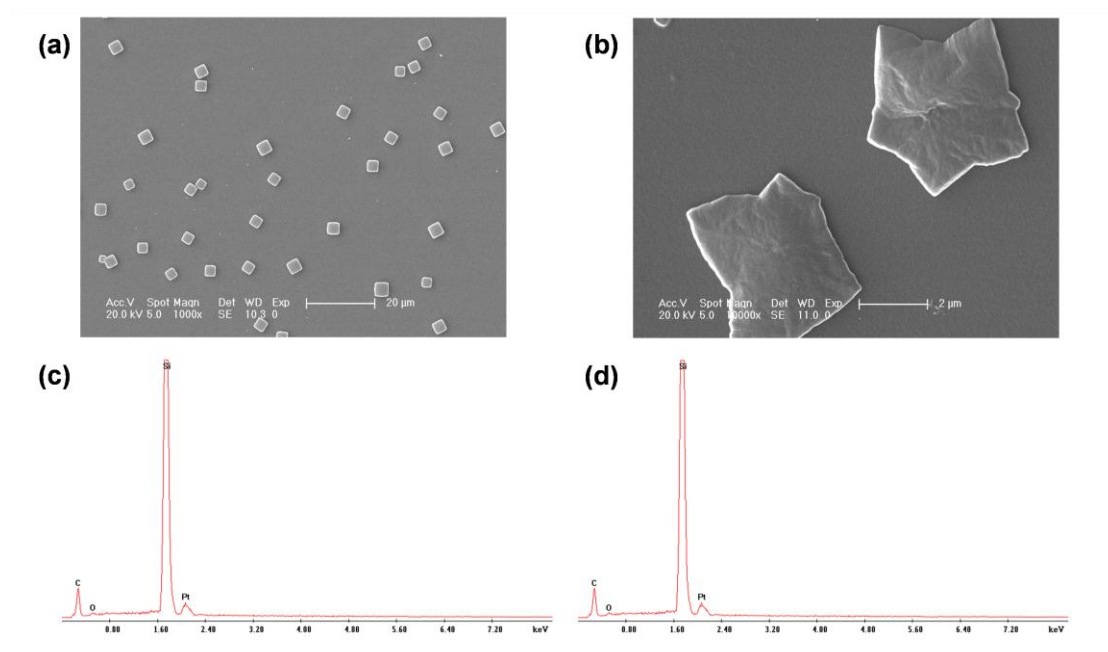

**Fig. S1.** (a, b) SEM images and (c-d) EDX spectra of (a, c) square and (b, d) polygonal crystals. The absence of sulfur singals in the EDX spectra of Fig. c and d indicates that the crystals showed in Fig. a and b are not P3HT, but PCBM crystals.

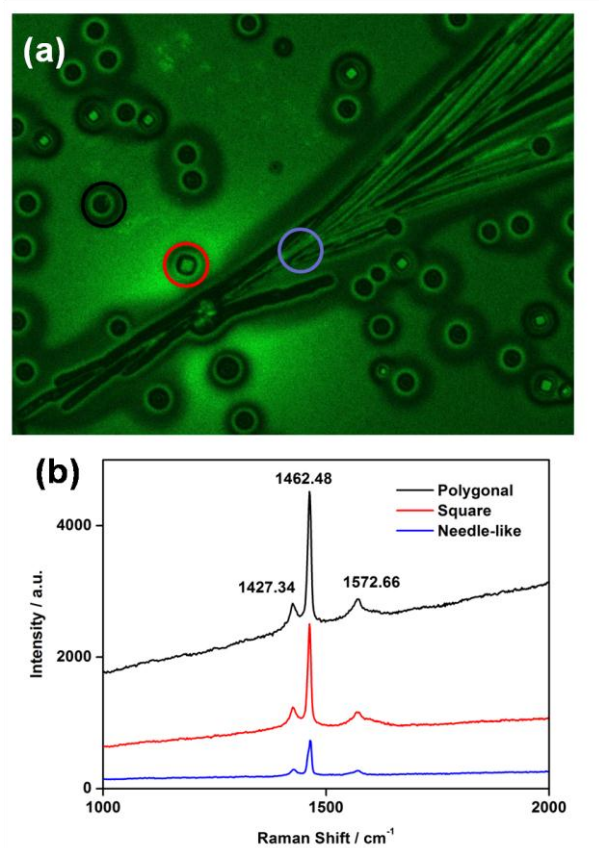

**Fig. S2.** (a) Optical microscopy image and (b) laser confocal Raman spectra of the (black) polygonal, (red) square and (blue) needle-like crystals showed in Fig. a. The three peaks located at 1427.34, 1462.48 and 1572.66  $\text{cm}^{-1}$  agree well with the Raman signals reported in the literature [1].

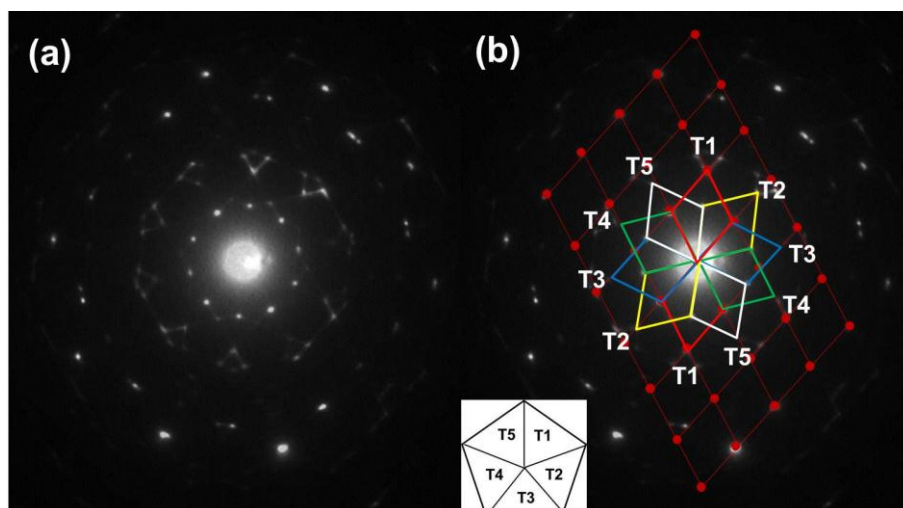

**Fig. S3.** (a) The original and the corresponding (b) indexed SAED patterns of PCBM crystals showing their five-fold twinned structure.

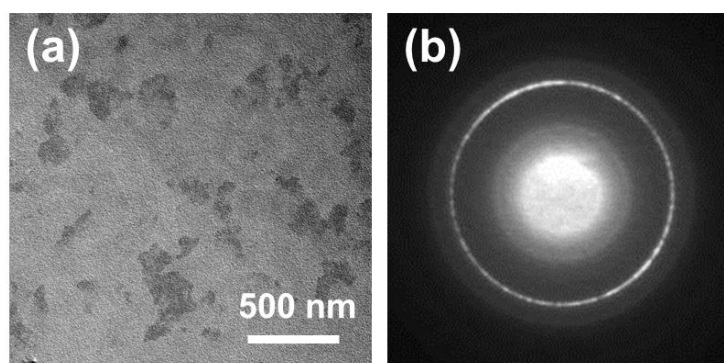

**Fig. S4.** (a) TEM image and the corresponding (b) SAED pattern of the glass-supported PCBM film after it was thermal annealed at 180 °C for 30 min.

Reference:

- [1] Falke, S.; Eravuchira, P.; Materny, A.; Lienau, C. Raman spectroscopic identification of fullerene inclusions in polymer/fullerene blends. *Journal of Raman Spectroscopy* 2011; 42(10):1897-900.
